# Supplementary material for: Pilot study characterizing a single pooled preparation of equine platelet lysate for nebulization in the horse
Source: Front Vet Sci. 2024 Dec 12;11:1488942. doi: 10.3389/fvets.2024.1488942 (PMC11670369; doi:10.3389/fvets.2024.1488942)
Supplement: Supplementary file 3 [file Table_1.XLSX]

## Sheet: venn_protein vs MWCO
	total	elements (Uniprot accessions)	Entry	Entry Name	Protein names	Gene Names	Organism	Length	Mass
Shared	n = 65	F6Y0C1	F6Y0C1	F6Y0C1_HORSE	TNF receptor associated factor 2	TRAF2 C8G	Equus caballus (Horse)	664	73085	green	Found in both protein (digested) lysate and MWCO peptides (no digestion)
		F7BH02	F7BH02	F7BH02_HORSE	Filamin A	FLNA	Equus caballus (Horse)	2647	280752
		A0A3Q2IEP2	A0A3Q2IEP2	A0A3Q2IEP2_HORSE	Coronin	CORO1C	Equus caballus (Horse)	480	53309
		F6Z041	F6Z041	F6Z041_HORSE	Beta-2-glycoprotein 1 (Apolipoprotein H) (Beta-2-glycoprotein I)	APOH	Equus caballus (Horse)	345	38524	blue	Found in protein (digested) lysate only
		P60708	P60708	ACTB_HORSE	Actin, cytoplasmic 1 (EC 3.6.4.-) (Beta-actin) [Cleaved into: Actin, cytoplasmic 1, N-terminally processed]	ACTB	Equus caballus (Horse)	375	41737
		A0A9L0RKE5	A0A9L0RKE5	A0A9L0RKE5_HORSE	Ig-like domain-containing protein		Equus caballus (Horse)	134	14685
		A0A9L0RPN5	A0A9L0RPN5	A0A9L0RPN5_HORSE	Lipocalin/cytosolic fatty-acid binding domain-containing protein	LOC100051562	Equus caballus (Horse)	201	23113	Orange	Found in MWCO peptides (no digestion) only
		F6XWM5	F6XWM5	F6XWM5_HORSE	Haptoglobin	LOC100067869	Equus caballus (Horse)	366	40488
		F6ZSB4	F6ZSB4	F6ZSB4_HORSE	Tubulin alpha chain	LOC100059285	Equus caballus (Horse)	452	50253
		F6T0P6	F6T0P6	F6T0P6_HORSE	Vitamin D-binding protein (Gc-globulin) (Group-specific component)	GC	Equus caballus (Horse)	488	54327
		F6X485	F6X485	F6X485_HORSE	Myosin-9 (Myosin heavy chain 9) (Myosin heavy chain, non-muscle IIa) (Non-muscle myosin heavy chain IIa)	MYH9	Equus caballus (Horse)	1981	229201
		F6UL68	F6UL68	F6UL68_HORSE	Transthyretin	TTR	Equus caballus (Horse)	147	15862
		F6VZY5	F6VZY5	F6VZY5_HORSE	Vasodilator stimulated phosphoprotein	VASP	Equus caballus (Horse)	385	40365
		F7BM31	F7BM31	F7BM31_HORSE	Serpin family D member 1	SERPIND1	Equus caballus (Horse)	496	56693
		A0A9L0TMJ7	A0A9L0TMJ7	A0A9L0TMJ7_HORSE	Tubulin alpha-4A chain	TUBA4A	Equus caballus (Horse)	610	67328
		A0A9L0QYU6	A0A9L0QYU6	A0A9L0QYU6_HORSE	Ig-like domain-containing protein		Equus caballus (Horse)	116	12054
		F7DRS2	F7DRS2	F7DRS2_HORSE	Corticosteroid-binding globulin (Serpin A6) (Transcortin)	SERPINA6	Equus caballus (Horse)	406	45329
		A0A9L0TEW9	A0A9L0TEW9	A0A9L0TEW9_HORSE	Complement C3	C3	Equus caballus (Horse)	1662	186284
		F7BFJ1	F7BFJ1	F7BFJ1_HORSE	Prothrombin (EC 3.4.21.5) (Coagulation factor II)	F2	Equus caballus (Horse)	622	70229
		F6YR34	F6YR34	F6YR34_HORSE	Thrombospondin 1	THBS1	Equus caballus (Horse)	1156	128020
		F6V881	F6V881	F6V881_HORSE	Vitronectin	VTN	Equus caballus (Horse)	485	54990
		Q28372	Q28372	GELS_HORSE	Gelsolin (Actin-depolymerizing factor) (ADF) (Brevin)	GSN	Equus caballus (Horse)	731	80827
		F7DP13	F7DP13	F7DP13_HORSE	Advillin	AVIL	Equus caballus (Horse)	793	89067
		F6RI47	F6RI47	F6RI47_HORSE	Alpha-2-macroglobulin	A2M	Equus caballus (Horse)	1476	164038
		F7DZE7	F7DZE7	F7DZE7_HORSE	Adiponectin, C1Q and collagen domain containing	ADIPOQ	Equus caballus (Horse)	239	25993
		F6PH38	F6PH38	F6PH38_HORSE	Fibrinogen beta chain	FGB	Equus caballus (Horse)	495	56249
		F6RMK1	F6RMK1	F6RMK1_HORSE	C-X-C motif chemokine	LOC100630489	Equus caballus (Horse)	111	11835
		A0A9L0SFT5	A0A9L0SFT5	A0A9L0SFT5_HORSE	Carboxylic ester hydrolase (EC 3.1.1.-)	LOC100050685	Equus caballus (Horse)	550	60076
		F6W2Y1	F6W2Y1	F6W2Y1_HORSE	Fibrinogen gamma chain	FGG	Equus caballus (Horse)	444	50503
		A0A3Q2HWQ6	A0A3Q2HWQ6	A0A3Q2HWQ6_HORSE	Complement C3	C3	Equus caballus (Horse)	1662	186423
		A0A5F5PM22	A0A5F5PM22	A0A5F5PM22_HORSE	Tubulin beta chain	TUBB2B	Equus caballus (Horse)	445	49953
		H9GZQ9	H9GZQ9	H9GZQ9_HORSE	Immunoglobulin heavy constant mu	IGHM	Equus caballus (Horse)	525	57547
		P30441	P30441	B2MG_HORSE	Beta-2-microglobulin	B2M	Equus caballus (Horse)	118	13426
		F7CYP1	F7CYP1	F7CYP1_HORSE	Alpha-1-antitrypsin	SPI2	Equus caballus (Horse)	421	46869
		A0A5F5PLA4	A0A5F5PLA4	A0A5F5PLA4_HORSE	Immunoglobulin heavy constant mu	IGHM	Equus caballus (Horse)	525	57235
		A0A9L0T6A2	A0A9L0T6A2	A0A9L0T6A2_HORSE	Talin 1	TLN1	Equus caballus (Horse)	2644	280996
		F6SAV5	F6SAV5	F6SAV5_HORSE	Tubulin alpha chain	TUBA1B	Equus caballus (Horse)	415	46108
		F6VJR6	F6VJR6	F6VJR6_HORSE	Alpha-1-B glycoprotein	A1BG	Equus caballus (Horse)	506	54553
		A0A3Q2HLJ4	A0A3Q2HLJ4	A0A3Q2HLJ4_HORSE	Tubulin beta chain	TUBB	Equus caballus (Horse)	492	54640
		A0A3Q2H3R5	A0A3Q2H3R5	A0A3Q2H3R5_HORSE	Tubulin beta chain	TUBB4B	Equus caballus (Horse)	424	47443
		F6YV40	F6YV40	F6YV40_HORSE	Glyceraldehyde-3-phosphate dehydrogenase (EC 1.2.1.12)	GAPDH	Equus caballus (Horse)	364	39183
		F6TDH5	F6TDH5	F6TDH5_HORSE	Coagulation factor X (EC 3.4.21.6) (Stuart factor)	F10	Equus caballus (Horse)	485	53769
		A0A9L0R4P3	A0A9L0R4P3	A0A9L0R4P3_HORSE	Apolipoprotein A-II (Apolipoprotein A2)	APOA2	Equus caballus (Horse)	84	9542
		A0A3Q2I0V8	A0A3Q2I0V8	A0A3Q2I0V8_HORSE	Apolipoprotein C-III (Apolipoprotein C3)	APOC3	Equus caballus (Horse)	117	12634
		A0A9L0SLS8	A0A9L0SLS8	A0A9L0SLS8_HORSE	Apolipoprotein M	APOM	Equus caballus (Horse)	188	21389
		P27425	P27425	TRFE_HORSE	Serotransferrin (Transferrin) (Beta-1 metal-binding globulin) (Siderophilin)	TF	Equus caballus (Horse)	706	78095
		F6ZI35	F6ZI35	F6ZI35_HORSE	Histidine-rich glycoprotein (Histidine-proline-rich glycoprotein)	HRG	Equus caballus (Horse)	483	54137
		F6PQ46	F6PQ46	F6PQ46_HORSE	Ceruloplasmin	CP	Equus caballus (Horse)	1066	121813
		A0A5F5Q0V8	A0A5F5Q0V8	A0A5F5Q0V8_HORSE	Alpha-2-HS-glycoprotein (Fetuin-A)	AHSG	Equus caballus (Horse)	363	38724
		F6W4R2	F6W4R2	F6W4R2_HORSE	Angiotensinogen (Serpin A8)	AGT	Equus caballus (Horse)	499	54526
		F6RCZ8	F6RCZ8	F6RCZ8_HORSE	Triggering receptor expressed on myeloid cells like 1	TREML1	Equus caballus (Horse)	314	32725
		F6ZTR4	F6ZTR4	F6ZTR4_HORSE	Nucleoporin 210 like	NUP210L TPM3	Equus caballus (Horse)	284	32924
		F7DLT3	F7DLT3	F7DLT3_HORSE	Amine oxidase (EC 1.4.3.-)	G6PC1 LOC100065718	Equus caballus (Horse)	791	87221
		P38029	P38029	A1AT2_HORSE	Alpha-1-antiproteinase 2 (Alpha-1-antitrypsin 2) (Alpha-1-proteinase inhibitor 2) (SPI2)		Equus caballus (Horse)	421	46942
		F6WU42	F6WU42	F6WU42_HORSE	Serglycin	SRGN	Equus caballus (Horse)	156	17233
		A0A5F5PTW4	A0A5F5PTW4	A0A5F5PTW4_HORSE	FERM domain containing kindlin 3	FERMT3	Equus caballus (Horse)	663	75442
		A0A3Q2KK07	A0A3Q2KK07	A0A3Q2KK07_HORSE	Apolipoprotein A-I (Apolipoprotein A1)	APOA1	Equus caballus (Horse)	244	27492
		F6Q666	F6Q666	F6Q666_HORSE	Tubulin beta chain	TUBB1	Equus caballus (Horse)	451	50407
		A0A5F5PEG5	A0A5F5PEG5	A0A5F5PEG5_HORSE	Protein AMBP	AMBP	Equus caballus (Horse)	352	39010
		A0A3Q2I2H1	A0A3Q2I2H1	A0A3Q2I2H1_HORSE	Ig-like domain-containing protein		Equus caballus (Horse)	100	10649
		A0A3Q2IDD2	A0A3Q2IDD2	A0A3Q2IDD2_HORSE	Complement factor B (EC 3.4.21.47) (C3/C5 convertase)	CFB	Equus caballus (Horse)	768	85985
		F6QXN5	F6QXN5	F6QXN5_HORSE	Transgelin	TAGLN2	Equus caballus (Horse)	219	24430
		A0A3Q2HTG2	A0A3Q2HTG2	A0A3Q2HTG2_HORSE	Fibrinogen alpha chain	FGA	Equus caballus (Horse)	733	77398
		A0A9L0RZP4	A0A9L0RZP4	A0A9L0RZP4_HORSE	Heat shock 70kDa protein 1A	HSPA1A	Equus caballus (Horse)	641	70156
		F6X1I8	F6X1I8	F6X1I8_HORSE	Hemopexin	HPX	Equus caballus (Horse)	462	51357
Protein digested	n = 219	A0A9L0RG95	A0A9L0RG95	A0A9L0RG95_HORSE	Complement C3	C3	Equus caballus (Horse)	1736	194262
		A0A3Q2ICP0	A0A3Q2ICP0	A0A3Q2ICP0_HORSE	Parvin beta	PARVB	Equus caballus (Horse)	350	39713
		A0A9L0TIY7	A0A9L0TIY7	A0A9L0TIY7_HORSE	Multiple inositol polyphosphate phosphatase 1 (EC 3.1.3.62) (EC 3.1.3.80) (2,3-bisphosphoglycerate 3-phosphatase)	MINPP1	Equus caballus (Horse)	559	63636
		A0A3Q2LG05	A0A3Q2LG05	A0A3Q2LG05_HORSE	Phosphatidylinositol-glycan-specific phospholipase D (EC 3.1.4.50) (Glycosyl-phosphatidylinositol-specific phospholipase D)	GPLD1	Equus caballus (Horse)	867	96119
		A0A3Q2H733	A0A3Q2H733	A0A3Q2H733_HORSE	Integrin-linked protein kinase (59 kDa serine/threonine-protein kinase) (Beta-integrin-linked kinase) (ILK-1) (ILK-2) (p59ILK)	ILK	Equus caballus (Horse)	507	57485
		A0A3Q2HLW1	A0A3Q2HLW1	A0A3Q2HLW1_HORSE	Proteasome activator subunit 4	PSME4	Equus caballus (Horse)	1864	214061
		A0A5F5PYF1	A0A5F5PYF1	A0A5F5PYF1_HORSE	14-3-3 protein epsilon	YWHAE	Equus caballus (Horse)	240	27419
		A0A9L0RY12	A0A9L0RY12	A0A9L0RY12_HORSE	Peptidase D	PEPD	Equus caballus (Horse)	505	56199
		A0A3Q2GUF0	A0A3Q2GUF0	A0A3Q2GUF0_HORSE	SANT and BTB domain regulator of CSR	SANBR	Equus caballus (Horse)	723	82373
		A0A9L0SSE2	A0A9L0SSE2	A0A9L0SSE2_HORSE	glutathione transferase (EC 2.5.1.18)	LOC100059533	Equus caballus (Horse)	220	23652
		F6Q841	F6Q841	F6Q841_HORSE	C-X-C motif chemokine	PPBP	Equus caballus (Horse)	140	14988
		F6UZI2	F6UZI2	F6UZI2_HORSE	Coagulation factor XIII A chain	F13A1	Equus caballus (Horse)	732	82873
		A0A3Q2IDE0	A0A3Q2IDE0	A0A3Q2IDE0_HORSE	Complement C2 (EC 3.4.21.43) (C3/C5 convertase)	C2	Equus caballus (Horse)	619	69059
		F6Z8W0	F6Z8W0	F6Z8W0_HORSE	WD repeat domain 1	WDR1	Equus caballus (Horse)	606	66239
		A0A9L0RX39	A0A9L0RX39	A0A9L0RX39_HORSE	Ig-like domain-containing protein		Equus caballus (Horse)	347	37538
		A0A9L0SW24	A0A9L0SW24	A0A9L0SW24_HORSE	Glutathione peroxidase	GPX3	Equus caballus (Horse)	233	26355
		P04365	P04365	IATR_HORSE	Inter-alpha-trypsin inhibitor (ITI) (EI-14) (HI-14) (Inhibitory fragment of ITI)		Equus caballus (Horse)	125	13726
		A0A3Q2HDW1	A0A3Q2HDW1	A0A3Q2HDW1_HORSE	MHC class I antigen 3.7	EQMCE1	Equus caballus (Horse)	364	41065
		A0A9L0SFU2	A0A9L0SFU2	A0A9L0SFU2_HORSE	Carboxypeptidase N subunit 2	CPN2	Equus caballus (Horse)	590	65104
		A0A3Q2GVG6	A0A3Q2GVG6	A0A3Q2GVG6_HORSE	WD repeat-containing protein 70	WDR70	Equus caballus (Horse)	634	70880
		P35747	P35747	ALBU_HORSE	Albumin (allergen Equ c 3)	ALB	Equus caballus (Horse)	607	68599
		A0A3Q2I053	A0A3Q2I053	A0A3Q2I053_HORSE	Ras-related protein Rab-11A (EC 3.6.5.2)	RAB11A	Equus caballus (Horse)	216	24394
		A0A9L0RJC8	A0A9L0RJC8	A0A9L0RJC8_HORSE	Hypoxanthine phosphoribosyltransferase (EC 2.4.2.8)	HPRT1	Equus caballus (Horse)	218	24609
		A0A3Q2L1J1	A0A3Q2L1J1	A0A3Q2L1J1_HORSE	Cytoplasmic linker associated protein 1	CLASP1	Equus caballus (Horse)	1482	163327
		A0A3Q2H306	A0A3Q2H306	A0A3Q2H306_HORSE	Ig-like domain-containing protein		Equus caballus (Horse)	101	11169
		A0A5F5PJC3	A0A5F5PJC3	A0A5F5PJC3_HORSE	Hyaluronan binding protein 2	HABP2	Equus caballus (Horse)	519	57990
		A0A3Q2HVB6	A0A3Q2HVB6	A0A3Q2HVB6_HORSE	Complement component 4 binding protein alpha	C4BPA	Equus caballus (Horse)	714	80211
		A0A3Q2I9S7	A0A3Q2I9S7	A0A3Q2I9S7_HORSE	Immunoglobulin heavy constant mu	IGHM	Equus caballus (Horse)	453	49908
		A0A9L0RV55	A0A9L0RV55	A0A9L0RV55_HORSE	Joining chain of multimeric IgA and IgM	JCHAIN	Equus caballus (Horse)	351	38375
		F6UJ33	F6UJ33	F6UJ33_HORSE	Profilin	PFN1	Equus caballus (Horse)	209	22014
		A0A3Q2I033	A0A3Q2I033	A0A3Q2I033_HORSE	EEIG family member 2	EEIG2	Equus caballus (Horse)	386	42367
		F6RHD5	F6RHD5	F6RHD5_HORSE	Adenine phosphoribosyltransferase (EC 2.4.2.7)	APRT	Equus caballus (Horse)	184	19434
		A0A9L0SLY6	A0A9L0SLY6	A0A9L0SLY6_HORSE	complement subcomponent C1r (EC 3.4.21.41)	C1R	Equus caballus (Horse)	705	80610
		F7DAF6	F7DAF6	F7DAF6_HORSE	Inter-alpha-trypsin inhibitor heavy chain 2	ITIH2	Equus caballus (Horse)	946	106366
		A0A9L0R7R8	A0A9L0R7R8	A0A9L0R7R8_HORSE	Phosphoglycerate kinase (EC 2.7.2.3)	PGK1	Equus caballus (Horse)	443	48037
		A0A3Q2IBC5	A0A3Q2IBC5	A0A3Q2IBC5_HORSE	Dystonin	DST	Equus caballus (Horse)	7734	875764
		H9GZT5	H9GZT5	H9GZT5_HORSE	Ig-like domain-containing protein		Equus caballus (Horse)	493	53994
		A0A9L0TG68	A0A9L0TG68	A0A9L0TG68_HORSE	Matrix metallopeptidase 19	MMP19	Equus caballus (Horse)	559	62978
		A0A9L0R2T0	A0A9L0R2T0	A0A9L0R2T0_HORSE	Uteroglobin (Secretoglobin family 1A member 1)		Equus caballus (Horse)	205	21972
		A0A5F5PPA5	A0A5F5PPA5	A0A5F5PPA5_HORSE	Serotransferrin (Beta-1 metal-binding globulin) (Siderophilin)	INHCA	Equus caballus (Horse)	710	78453
		F6ZEH8	F6ZEH8	F6ZEH8_HORSE	Serotransferrin (Beta-1 metal-binding globulin) (Siderophilin)	INHCA	Equus caballus (Horse)	695	76763
		A0A3Q2HAH3	A0A3Q2HAH3	A0A3Q2HAH3_HORSE	Peptidoglycan recognition protein 2		Equus caballus (Horse)	390	40917
		A0A3Q2IEM4	A0A3Q2IEM4	A0A3Q2IEM4_HORSE	Alpha-enolase (EC 4.2.1.11) (2-phospho-D-glycerate hydro-lyase) (Enolase 1) (Non-neural enolase)	ENO1	Equus caballus (Horse)	557	59798
		A0A3Q2HDF1	A0A3Q2HDF1	A0A3Q2HDF1_HORSE	Plasma retinol-binding protein	RBP4 LOC111773844	Equus caballus (Horse)	392	43039
		A0A3Q2HEJ5	A0A3Q2HEJ5	A0A3Q2HEJ5_HORSE	CD44 antigen (GP90 lymphocyte homing/adhesion receptor) (HUTCH-I) (Hermes antigen) (Hyaluronate receptor) (Phagocytic glycoprotein 1) (Phagocytic glycoprotein I)	CD44	Equus caballus (Horse)	695	76169
		A0A3Q2GTT0	A0A3Q2GTT0	A0A3Q2GTT0_HORSE	Ig-like domain-containing protein		Equus caballus (Horse)	106	11644
		A0A5F5PWN5	A0A5F5PWN5	A0A5F5PWN5_HORSE	Pentraxin family member	CRP	Equus caballus (Horse)	217	24530
		A0A3Q2HP30	A0A3Q2HP30	A0A3Q2HP30_HORSE	Tropomyosin alpha-4 chain (Tropomyosin-4)	TPM4	Equus caballus (Horse)	227	25923
		F7CN05	F7CN05	F7CN05_HORSE	Fibronectin	FN1	Equus caballus (Horse)	2387	262326
		A0A3Q2I8Y6	A0A3Q2I8Y6	A0A3Q2I8Y6_HORSE	Alpha-2-glycoprotein 1, zinc-binding	AZGP1	Equus caballus (Horse)	337	38225
		F6YZK3	F6YZK3	F6YZK3_HORSE	Ig-like domain-containing protein		Equus caballus (Horse)	106	11714
		F7DCD3	F7DCD3	F7DCD3_HORSE	Vesicle associated membrane protein 5	VAMP5	Equus caballus (Horse)	245	26559
		A0A5F5PM23	A0A5F5PM23	A0A5F5PM23_HORSE	Kallikrein B1	KLKB1	Equus caballus (Horse)	997	113358
		A0A9L0RWA6	A0A9L0RWA6	A0A9L0RWA6_HORSE	F-actin-capping protein subunit alpha	CAPZA1	Equus caballus (Horse)	274	31524
		F7DZ01	F7DZ01	F7DZ01_HORSE	Coagulation factor V	F5	Equus caballus (Horse)	2266	254956
		A0A3Q2LDV3	A0A3Q2LDV3	A0A3Q2LDV3_HORSE	Ninein	NIN	Equus caballus (Horse)	2049	237508
		A0A5F5PYP6	A0A5F5PYP6	A0A5F5PYP6_HORSE	Coagulation factor IX	F9	Equus caballus (Horse)	419	46946
		A0A3Q2HBA9	A0A3Q2HBA9	A0A3Q2HBA9_HORSE	Mannose binding lectin 2	MBL2	Equus caballus (Horse)	231	24872
		A0A5F5PZL5	A0A5F5PZL5	A0A5F5PZL5_HORSE	Vitamin K-dependent protein C (EC 3.4.21.69) (Anticoagulant protein C) (Autoprothrombin IIA) (Blood coagulation factor XIV)	PROC	Equus caballus (Horse)	681	73206
		F7BUV8	F7BUV8	F7BUV8_HORSE	Adiponectin A (Complement C1q B chain)	C1QB ADIA	Equus caballus (Horse)	252	26538
		A0A5F5PZ48	A0A5F5PZ48	A0A5F5PZ48_HORSE	Complement component C6	C6	Equus caballus (Horse)	954	107240
		A0A5F5PUE2	A0A5F5PUE2	A0A5F5PUE2_HORSE	Kininogen 1	KNG1	Equus caballus (Horse)	653	72383
		A0A5F5PJH9	A0A5F5PJH9	A0A5F5PJH9_HORSE	Extracellular matrix protein 1	ECM1	Equus caballus (Horse)	502	56392
		A0A9L0SV12	A0A9L0SV12	A0A9L0SV12_HORSE	BUB1 mitotic checkpoint serine/threonine kinase	BUB1	Equus caballus (Horse)	1076	120142
		A0A9L0T7S7	A0A9L0T7S7	A0A9L0T7S7_HORSE	Septin	SEPTIN2	Equus caballus (Horse)	384	43971
		A0A3Q2KUV4	A0A3Q2KUV4	A0A3Q2KUV4_HORSE	Platelet-activating factor acetylhydrolase (EC 3.1.1.47)	PLA2G7	Equus caballus (Horse)	485	54726
		A0A9L0RPF6	A0A9L0RPF6	A0A9L0RPF6_HORSE	Complement C1q subcomponent subunit A	C1QA	Equus caballus (Horse)	318	34007
		A0A9L0S7B8	A0A9L0S7B8	A0A9L0S7B8_HORSE	L-lactate dehydrogenase (EC 1.1.1.27)	LDHA	Equus caballus (Horse)	426	46731
		A0A9L0S5Y8	A0A9L0S5Y8	A0A9L0S5Y8_HORSE	Actin beta	ACTB	Equus caballus (Horse)	340	37580
		A0A9L0SIX2	A0A9L0SIX2	A0A9L0SIX2_HORSE	Apolipoprotein D	APOD	Equus caballus (Horse)	258	29114
		A0A3Q2HG43	A0A3Q2HG43	A0A3Q2HG43_HORSE	Ig-like domain-containing protein		Equus caballus (Horse)	106	11639
		A0A5F5PL54	A0A5F5PL54	A0A5F5PL54_HORSE	EGF containing fibulin extracellular matrix protein 2	EFEMP2	Equus caballus (Horse)	517	56379
		F7CYR1	F7CYR1	F7CYR1_HORSE	Antithrombin-III (Serpin C1)	SERPINC1	Equus caballus (Horse)	465	52603
		F6YWZ6	F6YWZ6	F6YWZ6_HORSE	Ubiquitin conjugating enzyme E2 Q1	UBE2Q1	Equus caballus (Horse)	405	44173
		A0A9L0TLN0	A0A9L0TLN0	A0A9L0TLN0_HORSE	Complement C7	C7	Equus caballus (Horse)	1056	116947
		A0A3Q2LFB3	A0A3Q2LFB3	A0A3Q2LFB3_HORSE	Actin, alpha cardiac muscle 1 (Alpha-cardiac actin)	ACTC1	Equus caballus (Horse)	392	43677
		A0A3Q2GXX5	A0A3Q2GXX5	A0A3Q2GXX5_HORSE	Fibulin-1	FBLN1	Equus caballus (Horse)	705	77696
		F7CAC5	F7CAC5	F7CAC5_HORSE	Ig-like domain-containing protein		Equus caballus (Horse)	149	15439
		A0A3Q2HAN3	A0A3Q2HAN3	A0A3Q2HAN3_HORSE	Vitamin K-dependent protein S	PROS1	Equus caballus (Horse)	912	99971
		A0A5F5PNC6	A0A5F5PNC6	A0A5F5PNC6_HORSE	Serpin B10	SERPINB10	Equus caballus (Horse)	403	46130
		H9GZV1	H9GZV1	H9GZV1_HORSE	Ig-like domain-containing protein		Equus caballus (Horse)	362	39235
		F7DU87	F7DU87	F7DU87_HORSE	BPI fold containing family A member 2	BPIFA2 LOC111769981 LOC111769983	Equus caballus (Horse)	249	26915
		A0A9L0RVT4	A0A9L0RVT4	A0A9L0RVT4_HORSE	CN hydrolase domain-containing protein	LOC100067649	Equus caballus (Horse)	499	56426
		A0A3Q2I427	A0A3Q2I427	A0A3Q2I427_HORSE	Leucine rich alpha-2-glycoprotein 1	LRG1	Equus caballus (Horse)	333	36788
		F6PRB1	F6PRB1	F6PRB1_HORSE	CECR2 histone acetyl-lysine reader	CECR2	Equus caballus (Horse)	1445	160251
		A0A9L0S925	A0A9L0S925	A0A9L0S925_HORSE	Immunoglobulin heavy constant mu	IGHM	Equus caballus (Horse)	519	56921
		A0A3Q2I2E9	A0A3Q2I2E9	A0A3Q2I2E9_HORSE	Albumin	ALB	Equus caballus (Horse)	644	72153
		A0A9L0RV13	A0A9L0RV13	A0A9L0RV13_HORSE	Complement C3	C3	Equus caballus (Horse)	1662	185811
		F6VBP9	F6VBP9	F6VBP9_HORSE	Apolipoprotein E	APOE	Equus caballus (Horse)	303	34105
		A0A3Q2H3F6	A0A3Q2H3F6	A0A3Q2H3F6_HORSE	Inter-alpha-trypsin inhibitor heavy chain 4	ITIH4	Equus caballus (Horse)	984	109047
		F6X6A6	F6X6A6	F6X6A6_HORSE	Peptidyl-prolyl cis-trans isomerase (PPIase) (EC 5.2.1.8)	PPIA	Equus caballus (Horse)	164	17885
		A0A3Q2LD29	A0A3Q2LD29	A0A3Q2LD29_HORSE	Fructose-bisphosphate aldolase (EC 4.1.2.13)	ALDOC	Equus caballus (Horse)	336	36205
		P81908	P81908	CHLE_HORSE	Cholinesterase (EC 3.1.1.8) (Acylcholine acylhydrolase) (Butyrylcholine esterase) (Choline esterase II) (EQ-BCHE) (Pseudocholinesterase)	BCHE	Equus caballus (Horse)	574	65642
		F6RZ27	F6RZ27	F6RZ27_HORSE	Apolipoprotein A-IV (Apolipoprotein A4)	APOA4	Equus caballus (Horse)	384	43615
		F6XNM9	F6XNM9	F6XNM9_HORSE	MSL complex subunit 3	MSL3	Equus caballus (Horse)	522	60086
		A0A5F5PLV2	A0A5F5PLV2	A0A5F5PLV2_HORSE	Carboxypeptidase B2	CPB2	Equus caballus (Horse)	459	52221
		A0A9L0SXE9	A0A9L0SXE9	A0A9L0SXE9_HORSE	Complement C1s	C1S	Equus caballus (Horse)	710	79064
		A0A3Q2HJE2	A0A3Q2HJE2	A0A3Q2HJE2_HORSE	MHC class I antigen 3.7	EQMCE1	Equus caballus (Horse)	354	40168
		F6TKW6	F6TKW6	F6TKW6_HORSE	GMP reductase (GMPR) (EC 1.7.1.7) (Guanosine 5'-monophosphate oxidoreductase) (Guanosine monophosphate reductase)	GMPR	Equus caballus (Horse)	312	33468
		A0A9L0RIF0	A0A9L0RIF0	A0A9L0RIF0_HORSE	Talin 1	TLN1	Equus caballus (Horse)	2487	264253
		A0A9L0R7H5	A0A9L0R7H5	A0A9L0R7H5_HORSE	C4a anaphylatoxin	LOC100059239	Equus caballus (Horse)	1744	192470
		F6YAZ9	F6YAZ9	F6YAZ9_HORSE	Myosin light chain 12A	LOC100051370	Equus caballus (Horse)	178	20498
		A0A9L0R8Q7	A0A9L0R8Q7	A0A9L0R8Q7_HORSE	Coronin	CORO1A	Equus caballus (Horse)	437	47844
		A0A3Q2H7N4	A0A3Q2H7N4	A0A3Q2H7N4_HORSE	Ig-like domain-containing protein		Equus caballus (Horse)	123	13389
		A0A9L0RUW3	A0A9L0RUW3	A0A9L0RUW3_HORSE	Ig-like domain-containing protein		Equus caballus (Horse)	120	13125
		A0A5F5PVA4	A0A5F5PVA4	A0A5F5PVA4_HORSE	Filamin B	FLNB	Equus caballus (Horse)	2633	281356
		A0A5F5PRE7	A0A5F5PRE7	A0A5F5PRE7_HORSE	Alpha-1-antitrypsin	SPI2	Equus caballus (Horse)	462	51490
		A0A3B0ITF5	A0A3B0ITF5	A0A3B0ITF5_HORSE	Adiponectin B (Complement C1q C chain)	C1QC ADIB	Equus caballus (Horse)	263	27506
		A0A5F5Q4D2	A0A5F5Q4D2	A0A5F5Q4D2_HORSE	Serpin family A member 10	SERPINA10	Equus caballus (Horse)	476	53609
		F7DXG8	F7DXG8	F7DXG8_HORSE	Cofilin-1 (Cofilin, non-muscle isoform)	CFL1	Equus caballus (Horse)	196	21570
		F6UMQ4	F6UMQ4	F6UMQ4_HORSE	Transforming growth factor-beta-induced protein ig-h3	TGFBI	Equus caballus (Horse)	734	79233
		F7BD82	F7BD82	F7BD82_HORSE	histone acetyltransferase (EC 2.3.1.48)	EP300	Equus caballus (Horse)	2430	265537
		A0A3Q2HYQ0	A0A3Q2HYQ0	A0A3Q2HYQ0_HORSE	Tubulin beta chain	TUBB3	Equus caballus (Horse)	509	56363
		A0A9L0TMV2	A0A9L0TMV2	A0A9L0TMV2_HORSE	Rab GDP dissociation inhibitor	GDI2	Equus caballus (Horse)	443	50151
		P01958	P01958	HBA_HORSE	Hemoglobin subunit alpha (Alpha-globin) (Hemoglobin alpha chain) [Cleaved into: Hemopressin]	HBA	Equus caballus (Horse)	142	15245
		F6Z4A7	F6Z4A7	F6Z4A7_HORSE	Ig-like domain-containing protein		Equus caballus (Horse)	180	19373
		F6PVG3	F6PVG3	F6PVG3_HORSE	EGF containing fibulin extracellular matrix protein 1	EFEMP1	Equus caballus (Horse)	614	66983
		A0A3Q2HIE9	A0A3Q2HIE9	A0A3Q2HIE9_HORSE	Myosin light chain 6	MYL6 MYL6B	Equus caballus (Horse)	151	16961
		A0A5F5PQS3	A0A5F5PQS3	A0A5F5PQS3_HORSE	Complement C8 alpha chain	C8A	Equus caballus (Horse)	589	65953
		A0A3Q2HRX3	A0A3Q2HRX3	A0A3Q2HRX3_HORSE	Apolipoprotein B	APOB	Equus caballus (Horse)	4562	515873
		A0A9L0RR06	A0A9L0RR06	A0A9L0RR06_HORSE	Apolipoprotein A-I (Apolipoprotein A1)	APOA1	Equus caballus (Horse)	251	28645
		F6QAD8	F6QAD8	F6QAD8_HORSE	Alpha-2-macroglobulin	LOC100061656	Equus caballus (Horse)	1467	163135
		A0A9L0RLM0	A0A9L0RLM0	A0A9L0RLM0_HORSE	14-3-3 protein beta/alpha	YWHAB	Equus caballus (Horse)	251	28814
		A0A5F5PF18	A0A5F5PF18	A0A5F5PF18_HORSE	small monomeric GTPase (EC 3.6.5.2)	RAP1B	Equus caballus (Horse)	184	20853
		F6YWX3	F6YWX3	F6YWX3_HORSE	Attractin	ATRN	Equus caballus (Horse)	1435	159505
		F7CR03	F7CR03	F7CR03_HORSE	Phospholipid transfer protein	PLTP	Equus caballus (Horse)	547	60079
		F7CC77	F7CC77	F7CC77_HORSE	Nucleosome assembly protein 1 like 1	NAP1L1	Equus caballus (Horse)	450	52062
		A0A9L0RHI6	A0A9L0RHI6	A0A9L0RHI6_HORSE	Serpin family A member 3	SERPINA3	Equus caballus (Horse)	425	47069
		A0A3Q2HC10	A0A3Q2HC10	A0A3Q2HC10_HORSE	CD5 molecule like	CD5L	Equus caballus (Horse)	355	39145
		A0A5F5Q0H5	A0A5F5Q0H5	A0A5F5Q0H5_HORSE	Lymphocyte cytosolic protein 1	LCP1	Equus caballus (Horse)	636	71316
		F6UVF8	F6UVF8	F6UVF8_HORSE	Septin	SEPTIN7	Equus caballus (Horse)	420	48952
		A0A5F5PZ03	A0A5F5PZ03	A0A5F5PZ03_HORSE	Pyruvate kinase (EC 2.7.1.40)	PKM	Equus caballus (Horse)	597	64943
		A0A9L0S1S1	A0A9L0S1S1	A0A9L0S1S1_HORSE	Inter-alpha-trypsin inhibitor heavy chain H1	ITIH1	Equus caballus (Horse)	908	101022
		A0A9L0SDT3	A0A9L0SDT3	A0A9L0SDT3_HORSE	Complement C3	C3	Equus caballus (Horse)	1732	193980
		A0A5F5PHD4	A0A5F5PHD4	A0A5F5PHD4_HORSE	Fibulin-1	FBLN1	Equus caballus (Horse)	686	75107
		A0A9L0RX02	A0A9L0RX02	A0A9L0RX02_HORSE	Vinculin (Metavinculin)	VCL	Equus caballus (Horse)	1352	146821
		A0A3Q2HND7	A0A3Q2HND7	A0A3Q2HND7_HORSE	Rab GDP dissociation inhibitor	GDI1	Equus caballus (Horse)	574	63579
		F6W2K5	F6W2K5	F6W2K5_HORSE	Polymeric immunoglobulin receptor	PIGR	Equus caballus (Horse)	817	88110
		A0A9L0R8S5	A0A9L0R8S5	A0A9L0R8S5_HORSE	KIAA1210	KIAA1210	Equus caballus (Horse)	1522	166798
		A0A9L0T0M3	A0A9L0T0M3	A0A9L0T0M3_HORSE	Paraoxonase (EC 3.1.1.2)	PON1	Equus caballus (Horse)	355	40183
		A0A9L0RP73	A0A9L0RP73	A0A9L0RP73_HORSE	Complement C3	C3	Equus caballus (Horse)	1662	185643
		A0A5F5PNM3	A0A5F5PNM3	A0A5F5PNM3_HORSE	Alpha-actinin-1 (Alpha-actinin cytoskeletal isoform) (F-actin cross-linking protein) (Non-muscle alpha-actinin-1)	ACTN1	Equus caballus (Horse)	869	99982
		A0A9L0RMF3	A0A9L0RMF3	A0A9L0RMF3_HORSE	Complement C5	C5	Equus caballus (Horse)	1679	188157
		F7A1S2	F7A1S2	F7A1S2_HORSE	Multimerin 1	MMRN1	Equus caballus (Horse)	1185	133209
		A0A9L0TER8	A0A9L0TER8	A0A9L0TER8_HORSE	Serpin family F member 2	SERPINF2	Equus caballus (Horse)	555	61513
		F6RRV1	F6RRV1	F6RRV1_HORSE	Fetuin B	FETUB	Equus caballus (Horse)	371	40730
		A0A3Q2HY39	A0A3Q2HY39	A0A3Q2HY39_HORSE	Ig-like domain-containing protein		Equus caballus (Horse)	173	18284
		F6UFT2	F6UFT2	F6UFT2_HORSE	Complement component C9	C9	Equus caballus (Horse)	547	61994
		F6PKE1	F6PKE1	F6PKE1_HORSE	Transferrin	INHCA	Equus caballus (Horse)	656	72290
		A0A3Q2H839	A0A3Q2H839	A0A3Q2H839_HORSE	Ig-like domain-containing protein		Equus caballus (Horse)	106	11527
		A0A3Q2H0H9	A0A3Q2H0H9	A0A3Q2H0H9_HORSE	Septin	SEPTIN6	Equus caballus (Horse)	482	55033
		F7AHF3	F7AHF3	F7AHF3_HORSE	Actin beta like 2	ACTBL2	Equus caballus (Horse)	370	41079
		F6S929	F6S929	F6S929_HORSE	Glutamate receptor	GRIN3A	Equus caballus (Horse)	1064	119380
		A0A9L0T0C4	A0A9L0T0C4	A0A9L0T0C4_HORSE	Actin beta	ACTB	Equus caballus (Horse)	364	40472
		A0A3Q2I6T1	A0A3Q2I6T1	A0A3Q2I6T1_HORSE	Selectin P	SELP	Equus caballus (Horse)	705	77452
		F6ZRF6	F6ZRF6	F6ZRF6_HORSE	Thyroxine-binding globulin (Serpin A7) (T4-binding globulin)	SERPINA7	Equus caballus (Horse)	437	49310
		F6YG82	F6YG82	F6YG82_HORSE	78 kDa glucose-regulated protein (Binding-immunoglobulin protein) (Heat shock protein 70 family protein 5) (Heat shock protein family A member 5) (Immunoglobulin heavy chain-binding protein)	HSPA5	Equus caballus (Horse)	654	72227
		A0A061DBP6	A0A061DBP6	A0A061DBP6_HORSE	von Willebrand factor (vWF)	VWF	Equus caballus (Horse)	2813	309183
		F6SIE2	F6SIE2	F6SIE2_HORSE	Tyrosine kinase 2	TYK2	Equus caballus (Horse)	554	60322
		F7AWQ9	F7AWQ9	F7AWQ9_HORSE	Interleukin 1 receptor accessory protein	IL1RAP	Equus caballus (Horse)	704	80515
		F6YWC0	F6YWC0	F6YWC0_HORSE	Sushi domain-containing protein	LOC106783161	Equus caballus (Horse)	193	21650
		F7AE68	F7AE68	F7AE68_HORSE	Inter-alpha-trypsin inhibitor heavy chain H3	ITIH3	Equus caballus (Horse)	884	98832
		F6VDC9	F6VDC9	F6VDC9_HORSE	Phosphoribosyl pyrophosphate synthase-associated protein 2	PRPSAP2	Equus caballus (Horse)	380	42098
		A0A3Q2LBD1	A0A3Q2LBD1	A0A3Q2LBD1_HORSE	Complement component C8 beta chain (Complement component 8 subunit beta)	C8B	Equus caballus (Horse)	590	66998
		A0A3Q2LBP6	A0A3Q2LBP6	A0A3Q2LBP6_HORSE	Complement factor D (EC 3.4.21.46) (Adipsin) (C3 convertase activator) (Properdin factor D)	CFD	Equus caballus (Horse)	419	43932
		A0A9L0SBW6	A0A9L0SBW6	A0A9L0SBW6_HORSE	Protein disulfide-isomerase (EC 5.3.4.1)	PDIA3	Equus caballus (Horse)	512	57684
		F7E3H8	F7E3H8	F7E3H8_HORSE	Sushi domain-containing protein	CFH	Equus caballus (Horse)	1192	135132
		F6SP74	F6SP74	F6SP74_HORSE	Complement factor properdin	CFP	Equus caballus (Horse)	468	51038
		F6W039	F6W039	F6W039_HORSE	Rho GDP-dissociation inhibitor 1 (Rho-GDI alpha)	ARHGDIA	Equus caballus (Horse)	305	34397
		F6XEB4	F6XEB4	F6XEB4_HORSE	14-3-3 protein zeta/delta	YWHAZ	Equus caballus (Horse)	245	27745
		A0A5F5Q1L6	A0A5F5Q1L6	A0A5F5Q1L6_HORSE	Ras suppressor protein 1	RSU1	Equus caballus (Horse)	274	31188
		A0A9L0TM80	A0A9L0TM80	A0A9L0TM80_HORSE	Ubiquitin carboxyl extension protein 80	RPS27A	Equus caballus (Horse)	217	24810
		H9GZV0	H9GZV0	H9GZV0_HORSE	Immunoglobulin heavy constant epsilon	IGHE	Equus caballus (Horse)	476	52372
		A0A5F5PU20	A0A5F5PU20	A0A5F5PU20_HORSE	Sushi domain-containing protein	LOC100060815	Equus caballus (Horse)	1006	114638
		A0A9L0RBL7	A0A9L0RBL7	A0A9L0RBL7_HORSE	Actin-like protein 3	ACTR3	Equus caballus (Horse)	278	31923
		F7CN11	F7CN11	F7CN11_HORSE	Fibronectin	FN1	Equus caballus (Horse)	2386	262472
		F6WM79	F6WM79	F6WM79_HORSE	Actin-related protein 2 (Actin-like protein 2)	ACTR2	Equus caballus (Horse)	392	44533
		A0A5F5PFW3	A0A5F5PFW3	A0A5F5PFW3_HORSE	Transferrin receptor protein 1	TFRC	Equus caballus (Horse)	767	85578
		A0A9L0RC24	A0A9L0RC24	A0A9L0RC24_HORSE	Complement factor I	CFI	Equus caballus (Horse)	658	73873
		F6R5Y2	F6R5Y2	F6R5Y2_HORSE	Serpin family A member 5	SERPINA5	Equus caballus (Horse)	414	46232
		F6REX3	F6REX3	F6REX3_HORSE	Pregnancy zone protein	LOC100061763	Equus caballus (Horse)	1477	164880
		A0A3Q2ICF5	A0A3Q2ICF5	A0A3Q2ICF5_HORSE	Spectrin repeat containing nuclear envelope protein 2	SYNE2	Equus caballus (Horse)	6915	796914
		P14452	P14452	FIBA_HORSE	Fibrinogen alpha chain [Cleaved into: Fibrinopeptide A]	FGA	Equus caballus (Horse)	14	1517
		A0A3Q2GTU4	A0A3Q2GTU4	A0A3Q2GTU4_HORSE	Fructose-bisphosphate aldolase (EC 4.1.2.13)	ALDOA	Equus caballus (Horse)	373	40443
		F6T7X3	F6T7X3	F6T7X3_HORSE	Amine oxidase (EC 1.4.3.-)	AOC3	Equus caballus (Horse)	775	86414
		A0A9L0TUF8	A0A9L0TUF8	A0A9L0TUF8_HORSE	Ig-like domain-containing protein	ICOSLG	Equus caballus (Horse)	379	42329
		A0A9L0T021	A0A9L0T021	A0A9L0T021_HORSE	Lumican	LUM	Equus caballus (Horse)	354	40370
		F7BKE1	F7BKE1	F7BKE1_HORSE	Serpin family F member 1	SERPINF1	Equus caballus (Horse)	417	46122
		A0A9L0S863	A0A9L0S863	A0A9L0S863_HORSE	Complement C3	C3	Equus caballus (Horse)	1662	186143
		F7DGR1	F7DGR1	F7DGR1_HORSE	Coagulation factor XII (EC 3.4.21.38) (Hageman factor)	F12	Equus caballus (Horse)	615	67323
		F7B3I5	F7B3I5	F7B3I5_HORSE	Afamin	AFM	Equus caballus (Horse)	604	68871
		A0A9L0TPP8	A0A9L0TPP8	A0A9L0TPP8_HORSE	6-phosphogluconate dehydrogenase, decarboxylating (EC 1.1.1.44)	PGD	Equus caballus (Horse)	540	59291
		F6RDD3	F6RDD3	F6RDD3_HORSE	Globin A1 (Hemoglobin, beta)	HBB GLNA1	Equus caballus (Horse)	147	16139
		F7BN73	F7BN73	F7BN73_HORSE	G-patch domain and ankyrin repeats 1	GPANK1	Equus caballus (Horse)	351	38995
		A0A3Q2I5T2	A0A3Q2I5T2	A0A3Q2I5T2_HORSE	Cystatin C	CST3	Equus caballus (Horse)	142	15201
		F7DXM5	F7DXM5	F7DXM5_HORSE	Alpha-1-antitrypsin	SPI2	Equus caballus (Horse)	421	46939
		F7DZB2	F7DZB2	F7DZB2_HORSE	Zyxin	ZYX	Equus caballus (Horse)	669	71269
		A0A5F5PMD7	A0A5F5PMD7	A0A5F5PMD7_HORSE	Alpha-1-antitrypsin	SPI2	Equus caballus (Horse)	421	46864
		A0A9L0R5P4	A0A9L0R5P4	A0A9L0R5P4_HORSE	Adenylyl cyclase-associated protein	CAP1	Equus caballus (Horse)	492	53422
		A0A9L0S2P1	A0A9L0S2P1	A0A9L0S2P1_HORSE	Coagulation factor XIII B chain	F13B	Equus caballus (Horse)	727	82826
		A0A3Q2LBE4	A0A3Q2LBE4	A0A3Q2LBE4_HORSE	Insulin like growth factor binding protein acid labile subunit	IGFALS	Equus caballus (Horse)	843	91538
		F7AW05	F7AW05	F7AW05_HORSE	C-type lectin domain family 3 member B	CLEC3B	Equus caballus (Horse)	232	25449
		A0A3Q2H8G8	A0A3Q2H8G8	A0A3Q2H8G8_HORSE	Carboxylic ester hydrolase (EC 3.1.1.-)	LOC100050764	Equus caballus (Horse)	562	61188
		A0A3Q2LDB5	A0A3Q2LDB5	A0A3Q2LDB5_HORSE	Maltase-glucoamylase	MGAM	Equus caballus (Horse)	1885	213358
		Q29482	Q29482	CLUS_HORSE	Clusterin [Cleaved into: Clusterin beta chain; Clusterin alpha chain]	CLU	Equus caballus (Horse)	449	52154
		F7AAK7	F7AAK7	F7AAK7_HORSE	Actin gamma 1	ACTG1	Equus caballus (Horse)	350	39006
		A0A3Q2LJK9	A0A3Q2LJK9	A0A3Q2LJK9_HORSE	L-lactate dehydrogenase (EC 1.1.1.27)	LDHB	Equus caballus (Horse)	390	43318
		A0A9L0TJX0	A0A9L0TJX0	A0A9L0TJX0_HORSE	Transcription factor AP-2 gamma	TFAP2C	Equus caballus (Horse)	471	50794
		A0A9L0S9I6	A0A9L0S9I6	A0A9L0S9I6_HORSE	Tetraspanin	CD9	Equus caballus (Horse)	268	29629
		A0A9L0R1J8	A0A9L0R1J8	A0A9L0R1J8_HORSE	Tyrosine-protein kinase (EC 2.7.10.2)	BTK	Equus caballus (Horse)	659	76329
		A0A9L0RDB8	A0A9L0RDB8	A0A9L0RDB8_HORSE	Pleckstrin	PLEK	Equus caballus (Horse)	350	39940
		O19010	O19010	CRIS3_HORSE	Cysteine-rich secretory protein 3 (CRISP-3) (Acidic epididymal glycoprotein 2) (AEG2)	CRISP3	Equus caballus (Horse)	245	27308
		A0A3Q2I7K7	A0A3Q2I7K7	A0A3Q2I7K7_HORSE	Hemoglobin, alpha 2	HBA2	Equus caballus (Horse)	145	15414
		A0A9L0SQ87	A0A9L0SQ87	A0A9L0SQ87_HORSE	Plasminogen (EC 3.4.21.7)	PLG	Equus caballus (Horse)	878	98006
		A0A9L0S6K4	A0A9L0S6K4	A0A9L0S6K4_HORSE	Myocardin related transcription factor B	MRTFB	Equus caballus (Horse)	1121	121574
		A0A5F5PR53	A0A5F5PR53	A0A5F5PR53_HORSE	F-actin-capping protein subunit beta	CAPZB	Equus caballus (Horse)	340	37738
		A0A5F5PKC5	A0A5F5PKC5	A0A5F5PKC5_HORSE	Titin	TTN	Equus caballus (Horse)	34359	3814644
		F7CZW9	F7CZW9	F7CZW9_HORSE	Serpin family G member 1	SERPING1	Equus caballus (Horse)	568	62275
		A0A5F5PR12	A0A5F5PR12	A0A5F5PR12_HORSE	Pantetheinase (EC 3.5.1.92) (Pantetheine hydrolase) (Vascular non-inflammatory molecule 1)	VNN1	Equus caballus (Horse)	459	51152
MWCO	n = 172	A0A9L0S4Q1	A0A9L0S4Q1	A0A9L0S4Q1_HORSE	Peptidase S1 domain-containing protein	LOC100067869	Equus caballus (Horse)	313	34441
		A0A9L0SWQ7	A0A9L0SWQ7	A0A9L0SWQ7_HORSE	Inositol 1,4,5-triphosphate receptor associated 1	IRAG1	Equus caballus (Horse)	901	97176
		A0A3Q2H5I9	A0A3Q2H5I9	A0A3Q2H5I9_HORSE	LIM and SH3 domain protein 1	LASP1	Equus caballus (Horse)	270	30712
		A0A9L0R6Y3	A0A9L0R6Y3	A0A9L0R6Y3_HORSE	Serine/threonine-protein phosphatase 2A 56 kDa regulatory subunit	PPP2R5E	Equus caballus (Horse)	402	46904
		A0A3Q2H6S1	A0A3Q2H6S1	A0A3Q2H6S1_HORSE	TSC22 domain family protein 3	TSC22D3	Equus caballus (Horse)	304	33002
		A0A5F5PY99	A0A5F5PY99	A0A5F5PY99_HORSE	Chaperonin containing TCP1 subunit 5	CCT5	Equus caballus (Horse)	487	54109
		A0A9L0TM00	A0A9L0TM00	A0A9L0TM00_HORSE	Ig-like domain-containing protein		Equus caballus (Horse)	134	14644
		F6U592	F6U592	F6U592_HORSE	PDZ and LIM domain 1	PDLIM1	Equus caballus (Horse)	303	33310
		A0A3Q2L0A4	A0A3Q2L0A4	A0A3Q2L0A4_HORSE	Ubiquitin-like-conjugating enzyme ATG3 (Autophagy-related protein 3)	ATG3	Equus caballus (Horse)	342	38861
		P05619	P05619	ILEU_HORSE	Leukocyte elastase inhibitor (LEI) (Serpin B1)	SERPINB1 ELANH2	Equus caballus (Horse)	379	43006
		K9KB03	K9KB03	K9KB03_HORSE	Rho GDP dissociation inhibitor beta (Rho GDP-dissociation inhibitor 2-like protein)	ARHGDIB	Equus caballus (Horse)	200	22861
		F6UWT0	F6UWT0	F6UWT0_HORSE	Protein phosphatase 1 regulatory subunit	PPP1R12A	Equus caballus (Horse)	1073	120049
		A0A3Q2L3U0	A0A3Q2L3U0	A0A3Q2L3U0_HORSE	UV excision repair protein RAD23	LOC111772206	Equus caballus (Horse)	385	40417
		A0A9L0S7C6	A0A9L0S7C6	A0A9L0S7C6_HORSE	Protein kinase cAMP-dependent type I regulatory subunit beta	PRKAR1B	Equus caballus (Horse)	343	38220
		F6ZGI6	F6ZGI6	F6ZGI6_HORSE	LDL receptor related protein 2	LRP2	Equus caballus (Horse)	4662	522641
		F6PZG1	F6PZG1	F6PZG1_HORSE	Pentraxin family member	CRP	Equus caballus (Horse)	223	25192
		A0A5F5PPW9	A0A5F5PPW9	A0A5F5PPW9_HORSE	GMP reductase (GMPR) (EC 1.7.1.7) (Guanosine 5'-monophosphate oxidoreductase) (Guanosine monophosphate reductase)	GMPR2 GMPR	Equus caballus (Horse)	318	34579
		A0A9L0RG67	A0A9L0RG67	A0A9L0RG67_HORSE	Atlastin GTPase 3	ATL3	Equus caballus (Horse)	536	60312
		F6YL89	F6YL89	F6YL89_HORSE	Cytoskeleton associated protein 5	CKAP5	Equus caballus (Horse)	1989	220212
		A0A3Q2KJL6	A0A3Q2KJL6	A0A3Q2KJL6_HORSE	Alpha-enolase (EC 4.2.1.11) (2-phospho-D-glycerate hydro-lyase) (Enolase 1) (Non-neural enolase)	ENO1	Equus caballus (Horse)	429	46632
		F6UA86	F6UA86	F6UA86_HORSE	Activator of HSP90 ATPase activity 1	AHSA1	Equus caballus (Horse)	341	38322
		A0A9L0S0W5	A0A9L0S0W5	A0A9L0S0W5_HORSE	Formin homology 2 domain containing 1	FHOD1	Equus caballus (Horse)	1086	117994
		A0A5F5PYW9	A0A5F5PYW9	A0A5F5PYW9_HORSE	Alpha-1-antitrypsin	SPI2	Equus caballus (Horse)	421	46867
		F6XSF7	F6XSF7	F6XSF7_HORSE	C4a anaphylatoxin	LOC100059239	Equus caballus (Horse)	1736	191591
		F6Z3U5	F6Z3U5	F6Z3U5_HORSE	FYN binding protein 1	FYB1	Equus caballus (Horse)	790	86085
		F7AZ96	F7AZ96	F7AZ96_HORSE	Unc-13 homolog D	UNC13D	Equus caballus (Horse)	1100	124296
		H9GZM9	H9GZM9	H9GZM9_HORSE	MAGE family member D2	MAGED2	Equus caballus (Horse)	596	63650
		Q28369	Q28369	RET4_HORSE	Retinol-binding protein 4 (Plasma retinol-binding protein) (PRBP) (RBP)	RBP4	Equus caballus (Horse)	201	23022
		A0A9L0T257	A0A9L0T257	A0A9L0T257_HORSE	Pleckstrin	PLEK	Equus caballus (Horse)	359	40873
		A0A3Q2HNH7	A0A3Q2HNH7	A0A3Q2HNH7_HORSE	Testin	TES	Equus caballus (Horse)	421	48002
		A0A3Q2I803	A0A3Q2I803	A0A3Q2I803_HORSE	PDZ and LIM domain 5	PDLIM5	Equus caballus (Horse)	607	64886
		F6WCN4	F6WCN4	F6WCN4_HORSE	Docking protein 2	DOK2	Equus caballus (Horse)	521	57265
		F7DDY0	F7DDY0	F7DDY0_HORSE	Chromosome 7 C19orf38 homolog	C7H19orf38	Equus caballus (Horse)	331	35973
		A0A9L0TCM1	A0A9L0TCM1	A0A9L0TCM1_HORSE	Synaptotagmin like 2	SYTL2	Equus caballus (Horse)	911	102628
		P48770	P48770	CO9_HORSE	Complement component C9	C9	Equus caballus (Horse)	547	62014
		A0A5F5Q0R8	A0A5F5Q0R8	A0A5F5Q0R8_HORSE	Protein phosphatase 1 regulatory subunit 1B (DARPP-32) (Dopamine- and cAMP-regulated neuronal phosphoprotein)	PPP1R1B	Equus caballus (Horse)	172	19450
		P02561	P02561	TPM4_HORSE	Tropomyosin alpha-4 chain (Platelet beta tropomyosin) (Tropomyosin-4)	TPM4	Equus caballus (Horse)	248	28523
		A0A9L0TCY5	A0A9L0TCY5	A0A9L0TCY5_HORSE	Programmed cell death 6 interacting protein	PDCD6IP	Equus caballus (Horse)	821	91097
		F7BCY9	F7BCY9	F7BCY9_HORSE	Protein kinase C and casein kinase substrate in neurons protein 1	PACSIN1	Equus caballus (Horse)	444	50763
		A0A3Q2H273	A0A3Q2H273	A0A3Q2H273_HORSE	Protein 4.1 (Band 4.1) (Erythrocyte membrane protein band 4.1)	EPB41	Equus caballus (Horse)	764	84440
		F6PPV8	F6PPV8	F6PPV8_HORSE	Semaphorin 4D	SEMA4D	Equus caballus (Horse)	889	98748
		F6S573	F6S573	F6S573_HORSE	YEATS domain containing 2	YEATS2	Equus caballus (Horse)	1415	150061
		A0A3Q2I982	A0A3Q2I982	A0A3Q2I982_HORSE	IQ motif containing GTPase activating protein 1	IQGAP1	Equus caballus (Horse)	1645	187509
		A0A3Q2LJM7	A0A3Q2LJM7	A0A3Q2LJM7_HORSE	Ig-like domain-containing protein		Equus caballus (Horse)	144	15918
		F6SHH7	F6SHH7	F6SHH7_HORSE	Septin 2	SEPTIN2	Equus caballus (Horse)	94	10296
		F7E107	F7E107	F7E107_HORSE	Protein phosphatase 1 regulatory subunit 1B (DARPP-32) (Dopamine- and cAMP-regulated neuronal phosphoprotein)	PPP1R1B	Equus caballus (Horse)	188	21086
		A0A5F5PHC9	A0A5F5PHC9	A0A5F5PHC9_HORSE	Sodium channel protein	GORASP1 SCN11A	Equus caballus (Horse)	1781	203655
		F7C0D9	F7C0D9	F7C0D9_HORSE	Kininogen 1	KNG1	Equus caballus (Horse)	429	47957
		A0A3Q2KU34	A0A3Q2KU34	A0A3Q2KU34_HORSE	Leucine-rich repeat flightless-interacting protein 2	LRRFIP2	Equus caballus (Horse)	743	84621
		A0A3Q2LAR7	A0A3Q2LAR7	A0A3Q2LAR7_HORSE	Carboxylic ester hydrolase (EC 3.1.1.-)	LOC100051065	Equus caballus (Horse)	565	62037
		A0A5F5PY44	A0A5F5PY44	A0A5F5PY44_HORSE	Pyruvate kinase (EC 2.7.1.40)	PKM	Equus caballus (Horse)	506	55078
		A0A9L0T2J3	A0A9L0T2J3	A0A9L0T2J3_HORSE	Hematopoietic cell-specific Lyn substrate 1	HCLS1	Equus caballus (Horse)	451	49910
		A0A9L0SVV7	A0A9L0SVV7	A0A9L0SVV7_HORSE	Linker for activation of T cells	LAT	Equus caballus (Horse)	228	24494
		A0A3Q2KSG2	A0A3Q2KSG2	A0A3Q2KSG2_HORSE	Kinesin motor domain-containing protein	CENPE	Equus caballus (Horse)	2755	322573
		F6UX87	F6UX87	F6UX87_HORSE	Inverted formin 2	INF2	Equus caballus (Horse)	535	57639
		A0A3Q2IDR5	A0A3Q2IDR5	A0A3Q2IDR5_HORSE	Cardiotrophin 1	CTF1	Equus caballus (Horse)	457	48333
		F7BUY8	F7BUY8	F7BUY8_HORSE	phosphatidylinositol-3,4,5-trisphosphate 5-phosphatase (EC 3.1.3.86)	INPP5D	Equus caballus (Horse)	1182	132612
		A0A3Q2HWX5	A0A3Q2HWX5	A0A3Q2HWX5_HORSE	Sperm associated antigen 9	SPAG9	Equus caballus (Horse)	1173	128449
		A0A3Q2I1Y0	A0A3Q2I1Y0	A0A3Q2I1Y0_HORSE	Pleckstrin homology domain containing O2	PLEKHO2	Equus caballus (Horse)	499	54088
		A0A3Q2HEE5	A0A3Q2HEE5	A0A3Q2HEE5_HORSE	Calponin	CNN2	Equus caballus (Horse)	270	29302
		A0A9L0TP99	A0A9L0TP99	A0A9L0TP99_HORSE	CD5 molecule like	CD5L	Equus caballus (Horse)	389	42675
		A0A9L0RKA7	A0A9L0RKA7	A0A9L0RKA7_HORSE	Protein phosphatase 1 regulatory subunit 18	PPP1R18	Equus caballus (Horse)	600	66155
		A0A9L0R5H3	A0A9L0R5H3	A0A9L0R5H3_HORSE	Stromal interaction molecule 1	STIM1	Equus caballus (Horse)	677	76670
		A0A3Q2KKS6	A0A3Q2KKS6	A0A3Q2KKS6_HORSE	Capping protein inhibiting regulator of actin dynamics	CRACD	Equus caballus (Horse)	1335	153681
		F6SSS5	F6SSS5	F6SSS5_HORSE	AT-rich interaction domain 4B	ARID4B	Equus caballus (Horse)	1315	147525
		F6VP61	F6VP61	F6VP61_HORSE	Serpin B10	SERPINB10	Equus caballus (Horse)	397	45412
		A0A3Q2KXT4	A0A3Q2KXT4	A0A3Q2KXT4_HORSE	RAB11 family interacting protein 5	RAB11FIP5	Equus caballus (Horse)	1305	136634
		A0A9L0S5C9	A0A9L0S5C9	A0A9L0S5C9_HORSE	Complement C1q B chain	C1QB	Equus caballus (Horse)	244	26358
		A0A3Q2KQR1	A0A3Q2KQR1	A0A3Q2KQR1_HORSE	RNA helicase (EC 3.6.4.13)	DDX47	Equus caballus (Horse)	455	50733
		A0A3Q2I5H4	A0A3Q2I5H4	A0A3Q2I5H4_HORSE	Nuclear factor 1	NFIA	Equus caballus (Horse)	547	60371
		F6TZX8	F6TZX8	F6TZX8_HORSE	DNA topoisomerase I (EC 5.6.2.1) (DNA topoisomerase 1)	TOP1	Equus caballus (Horse)	767	90856
		A0A9L0S3A7	A0A9L0S3A7	A0A9L0S3A7_HORSE	Antithrombin-III (Serpin C1)	SERPINC1	Equus caballus (Horse)	463	52370
		F7BSH5	F7BSH5	F7BSH5_HORSE	PDZ and LIM domain protein 7	DBN1	Equus caballus (Horse)	467	50479
		A0A3Q2H2U9	A0A3Q2H2U9	A0A3Q2H2U9_HORSE	LRR binding FLII interacting protein 1	LRRFIP1	Equus caballus (Horse)	837	92370
		A0A3Q2LTD5	A0A3Q2LTD5	A0A3Q2LTD5_HORSE	Cas scaffold protein family member 4	CASS4	Equus caballus (Horse)	975	109128
		F7A5E3	F7A5E3	F7A5E3_HORSE	Actin gamma 1	ACTG1	Equus caballus (Horse)	364	40576
		A0A9L0SWG8	A0A9L0SWG8	A0A9L0SWG8_HORSE	G protein subunit beta 4	GNB4	Equus caballus (Horse)	327	36211
		A0A3Q2ICU4	A0A3Q2ICU4	A0A3Q2ICU4_HORSE	SEC14 like lipid binding 3	SEC14L3	Equus caballus (Horse)	323	36862
		Q0W9Q0	Q0W9Q0	Q0W9Q0_HORSE	Beta defensin 3	defb3	Equus caballus (Horse)	64	6715
		A0A3Q2HW24	A0A3Q2HW24	A0A3Q2HW24_HORSE	Joining chain of multimeric IgA and IgM	JCHAIN	Equus caballus (Horse)	187	20644
		A0A9L0R7T7	A0A9L0R7T7	A0A9L0R7T7_HORSE	Bcl-2-like protein 1 (Apoptosis regulator Bcl-X)	BCL2L1	Equus caballus (Horse)	228	25352
		A0A3Q2GY21	A0A3Q2GY21	A0A3Q2GY21_HORSE	Tubulin alpha chain	TUBA1A	Equus caballus (Horse)	505	56548
		A0A9L0SHQ2	A0A9L0SHQ2	A0A9L0SHQ2_HORSE	LIM domain containing 2	LIMD2	Equus caballus (Horse)	128	14157
		A0A9L0SM22	A0A9L0SM22	A0A9L0SM22_HORSE	Solute carrier family 2, facilitated glucose transporter member 3 (GLUT-3) (Glucose transporter type 3)	SLC2A3	Equus caballus (Horse)	462	50826
		F6RYI0	F6RYI0	F6RYI0_HORSE	Transmembrane protein 40	TMEM40	Equus caballus (Horse)	239	26201
		F7DNT0	F7DNT0	F7DNT0_HORSE	Tubulin alpha-4A chain	TUBA4A	Equus caballus (Horse)	405	45313
		F6VS59	F6VS59	F6VS59_HORSE	Parvin beta	PARVB	Equus caballus (Horse)	696	78441
		A0A3Q2HBR4	A0A3Q2HBR4	A0A3Q2HBR4_HORSE	Haptoglobin	LOC100067869	Equus caballus (Horse)	322	35761
		A0A3Q2HIC9	A0A3Q2HIC9	A0A3Q2HIC9_HORSE	Signal induced proliferation associated 1 like 1	SIPA1L1	Equus caballus (Horse)	1733	192181
		A0A5F5PXJ4	A0A5F5PXJ4	A0A5F5PXJ4_HORSE	Endosulfine alpha	ENSA	Equus caballus (Horse)	105	11869
		F6RMN2	F6RMN2	F6RMN2_HORSE	Drebrin like	DBNL	Equus caballus (Horse)	404	45836
		A0A9L0SQ47	A0A9L0SQ47	A0A9L0SQ47_HORSE	Transforming growth factor beta 1 induced transcript 1	TGFB1I1	Equus caballus (Horse)	423	44968
		A0A9L0S975	A0A9L0S975	A0A9L0S975_HORSE	Hepcidin antimicrobial peptide	HAMP	Equus caballus (Horse)	93	9664
		A0A9L0RMX8	A0A9L0RMX8	A0A9L0RMX8_HORSE	LBH domain-containing protein	LBHD2	Equus caballus (Horse)	137	14243
		A0A9L0RH65	A0A9L0RH65	A0A9L0RH65_HORSE	AT-rich interaction domain 4A	ARID4A	Equus caballus (Horse)	1190	134958
		A0A9L0T563	A0A9L0T563	A0A9L0T563_HORSE	Secretory carrier-associated membrane protein (Secretory carrier membrane protein)	SCAMP2	Equus caballus (Horse)	314	35394
		A0A3Q2HTR2	A0A3Q2HTR2	A0A3Q2HTR2_HORSE	Rho GTPase activating protein 18	ARHGAP18	Equus caballus (Horse)	664	74836
		A0A3Q2I2V4	A0A3Q2I2V4	A0A3Q2I2V4_HORSE	Tripartite motif containing 24	TRIM24	Equus caballus (Horse)	1050	116581
		F7A692	F7A692	F7A692_HORSE	Complement C5	C5	Equus caballus (Horse)	1672	187361
		A0A5S7MJB1	A0A5S7MJB1	A0A5S7MJB1_HORSE	Clusterin	CLU	Equus caballus (Horse)	450	52282
		A0A5F5PKQ6	A0A5F5PKQ6	A0A5F5PKQ6_HORSE	Eukaryotic translation initiation factor 4B	EIF4B	Equus caballus (Horse)	572	64637
		A0A3Q2HQM9	A0A3Q2HQM9	A0A3Q2HQM9_HORSE	EH domain binding protein 1	EHBP1	Equus caballus (Horse)	1159	132290
		A0A9L0RPJ3	A0A9L0RPJ3	A0A9L0RPJ3_HORSE	Caveolae associated protein 2	CAVIN2	Equus caballus (Horse)	425	47105
		A0A9L0RFB9	A0A9L0RFB9	A0A9L0RFB9_HORSE	Microtubule associated protein RP/EB family member 2	MAPRE2	Equus caballus (Horse)	261	29376
		A0A5F5PH65	A0A5F5PH65	A0A5F5PH65_HORSE	Septin 9	SEPTIN9	Equus caballus (Horse)	578	64695
		F7A2B6	F7A2B6	F7A2B6_HORSE	Rab proteins geranylgeranyltransferase component A	CHM	Equus caballus (Horse)	660	73763
		A0A3Q2ICY6	A0A3Q2ICY6	A0A3Q2ICY6_HORSE	Cytochrome b-245 heavy chain (CGD91-phox) (Cytochrome b(558) subunit beta) (Heme-binding membrane glycoprotein gp91phox) (Neutrophil cytochrome b 91 kDa polypeptide) (gp91-1) (gp91-phox) (p22 phagocyte B-cytochrome)	CYBB	Equus caballus (Horse)	580	66931
		A0A3Q2L058	A0A3Q2L058	A0A3Q2L058_HORSE	Ig-like domain-containing protein		Equus caballus (Horse)	265	30489
		A0A3Q2GV71	A0A3Q2GV71	A0A3Q2GV71_HORSE	Tyrosine-protein kinase (EC 2.7.10.2)	SRC	Equus caballus (Horse)	540	60468
		F7D7Z9	F7D7Z9	F7D7Z9_HORSE	PurE domain-containing protein	PAICS	Equus caballus (Horse)	395	43931
		F6YFD1	F6YFD1	F6YFD1_HORSE	Sodium/hydrogen exchanger	SLC9A4	Equus caballus (Horse)	797	90720
		A0A3Q2H4M1	A0A3Q2H4M1	A0A3Q2H4M1_HORSE	ATP-citrate synthase (EC 2.3.3.8) (ATP-citrate (pro-S-)-lyase) (Citrate cleavage enzyme)	ACLY	Equus caballus (Horse)	1047	115059
		F6RLT8	F6RLT8	F6RLT8_HORSE	Calpain small subunit 1	CAPNS1	Equus caballus (Horse)	265	28100
		A0A5F5PZX6	A0A5F5PZX6	A0A5F5PZX6_HORSE	Tubulin alpha chain	TUBA1A	Equus caballus (Horse)	451	50136
		A0A9L0SM87	A0A9L0SM87	A0A9L0SM87_HORSE	Cysteine and glycine-rich protein 1 (Cysteine-rich protein 1)	CSRP1	Equus caballus (Horse)	220	23350
		F7CR22	F7CR22	F7CR22_HORSE	Coatomer subunit delta	ARCN1	Equus caballus (Horse)	540	60375
		A0A9L0S0K9	A0A9L0S0K9	A0A9L0S0K9_HORSE	Glucose-6-phosphate 1-dehydrogenase (EC 1.1.1.49)	G6PD	Equus caballus (Horse)	486	55937
		A0A3Q2IAJ1	A0A3Q2IAJ1	A0A3Q2IAJ1_HORSE	SH3 domain-containing protein	UBASH3B	Equus caballus (Horse)	631	70859
		A0A5F5PVD8	A0A5F5PVD8	A0A5F5PVD8_HORSE	Secretory carrier-associated membrane protein (Secretory carrier membrane protein)	CLK2 SCAMP3	Equus caballus (Horse)	332	36720
		F6ZSZ5	F6ZSZ5	F6ZSZ5_HORSE	Vinculin (Metavinculin)	VCL	Equus caballus (Horse)	1096	119737
		Q8MKD1	Q8MKD1	UBB_HORSE	Polyubiquitin-B [Cleaved into: Ubiquitin; Ubiquitin-related]	UBB	Equus caballus (Horse)	305	34342
		F6Z8T7	F6Z8T7	F6Z8T7_HORSE	Endothelial cell adhesion molecule	ESAM	Equus caballus (Horse)	352	36896
		F6WA83	F6WA83	F6WA83_HORSE	RAS guanyl releasing protein 2	RASGRP2	Equus caballus (Horse)	614	69874
		A0A3Q2H9I2	A0A3Q2H9I2	A0A3Q2H9I2_HORSE	RAB11 family interacting protein 1	RAB11FIP1	Equus caballus (Horse)	1280	136370
		A0A3Q2GTT5	A0A3Q2GTT5	A0A3Q2GTT5_HORSE	Insulin-like growth factor II	IGF2	Equus caballus (Horse)	435	47452
		A0A3Q2HWP2	A0A3Q2HWP2	A0A3Q2HWP2_HORSE	Caldesmon 1	CALD1	Equus caballus (Horse)	537	62571
		F6RHB3	F6RHB3	F6RHB3_HORSE	Dynein cytoplasmic 1 heavy chain 1	DYNC1H1	Equus caballus (Horse)	4593	527058
		P62327	P62327	TYB4_HORSE	Thymosin beta-4 (T beta-4) [Cleaved into: Hemoregulatory peptide AcSDKP (N-acetyl-SDKP) (AcSDKP) (Seraspenide)]	TMSB4 THYB4	Equus caballus (Horse)	44	5053
		A0A5F5PSB5	A0A5F5PSB5	A0A5F5PSB5_HORSE	Programmed cell death 5	PDCD5	Equus caballus (Horse)	40	4447
		A0A3Q2H333	A0A3Q2H333	A0A3Q2H333_HORSE	Albumin	ALB	Equus caballus (Horse)	637	71643
		A0A3Q2I8A3	A0A3Q2I8A3	A0A3Q2I8A3_HORSE	Protein kinase C (EC 2.7.11.13)	PRKCB	Equus caballus (Horse)	673	76915
		A0A3Q2KPJ8	A0A3Q2KPJ8	A0A3Q2KPJ8_HORSE	peptidylprolyl isomerase (EC 5.2.1.8)	FKBP5	Equus caballus (Horse)	452	50714
		A0A3Q2KVK0	A0A3Q2KVK0	A0A3Q2KVK0_HORSE	Cytoplasmic dynein 2 heavy chain 1	DYNC2H1	Equus caballus (Horse)	4120	471816
		A0A9L0S1R2	A0A9L0S1R2	A0A9L0S1R2_HORSE	F-actin-capping protein subunit beta	CAPZB	Equus caballus (Horse)	317	35478
		A0A3Q2GW07	A0A3Q2GW07	A0A3Q2GW07_HORSE	Nucleosome assembly protein 1 like 1	NAP1L1	Equus caballus (Horse)	384	44563
		A0A3Q2I474	A0A3Q2I474	A0A3Q2I474_HORSE	Granulin	GRN	Equus caballus (Horse)	568	60116
		A0A3Q2I4K8	A0A3Q2I4K8	A0A3Q2I4K8_HORSE	Nuclear receptor binding protein 1	NRBP1	Equus caballus (Horse)	483	54224
		A0A5F5PHR2	A0A5F5PHR2	A0A5F5PHR2_HORSE	aldehyde oxidase (EC 1.2.3.1)	AOX1	Equus caballus (Horse)	1221	134077
		A0A9L0RH73	A0A9L0RH73	A0A9L0RH73_HORSE	Insulin-like growth factor-binding protein 3	IGFBP3	Equus caballus (Horse)	299	32169
		A0A3Q2HXM4	A0A3Q2HXM4	A0A3Q2HXM4_HORSE	Nebulette	NEBL	Equus caballus (Horse)	873	100204
		F7CVF5	F7CVF5	F7CVF5_HORSE	Coronin	CORO1B	Equus caballus (Horse)	468	51829
		A0A9L0SV19	A0A9L0SV19	A0A9L0SV19_HORSE	Endoplasmic reticulum metallopeptidase 1	ERMP1	Equus caballus (Horse)	695	77383
		Q28377	Q28377	FINC_HORSE	Fibronectin (FN) [Cleaved into: Anastellin]	FN1	Equus caballus (Horse)	2477	272168
		A0A5F5PSR4	A0A5F5PSR4	A0A5F5PSR4_HORSE	Titin	TTN	Equus caballus (Horse)	33185	3683917
		F6Y5P3	F6Y5P3	F6Y5P3_HORSE	Ubiquitin carboxyl-terminal hydrolase (EC 3.4.19.12)	MINDY1	Equus caballus (Horse)	469	51703
		A0A3Q2ICN9	A0A3Q2ICN9	A0A3Q2ICN9_HORSE	Kinesin family member 13B	KIF13B	Equus caballus (Horse)	1953	215489
		H9GZN3	H9GZN3	H9GZN3_HORSE	WASP actin nucleation promoting factor	WAS	Equus caballus (Horse)	571	60104
		A0A3Q2HIC6	A0A3Q2HIC6	A0A3Q2HIC6_HORSE	Smoothelin	SMTN	Equus caballus (Horse)	858	92885
		A0A9L0TNP9	A0A9L0TNP9	A0A9L0TNP9_HORSE	Sorting nexin 3	SNX3	Equus caballus (Horse)	196	22194
		A0A3Q2L7R0	A0A3Q2L7R0	A0A3Q2L7R0_HORSE	Plasminogen (EC 3.4.21.7)	PLG	Equus caballus (Horse)	815	91678
		A0A9R1SKF4	A0A9R1SKF4	A0A9R1SKF4_HORSE	MHC class II DQ-beta chain	DQB	Equus caballus (Horse)	264	30095
		F6VFB4	F6VFB4	F6VFB4_HORSE	Reticulon	RTN4	Equus caballus (Horse)	1196	129710
		A0A3Q2HTN6	A0A3Q2HTN6	A0A3Q2HTN6_HORSE	WD repeat and FYVE domain containing 3	WDFY3	Equus caballus (Horse)	3545	397626
		F7BTK9	F7BTK9	F7BTK9_HORSE	Niban apoptosis regulator 1	NIBAN1	Equus caballus (Horse)	924	102158
		A0A3Q2HM18	A0A3Q2HM18	A0A3Q2HM18_HORSE	Moesin (Membrane-organizing extension spike protein)	MSN	Equus caballus (Horse)	581	68172
		A0A5F5PR19	A0A5F5PR19	A0A5F5PR19_HORSE	Septin	SEPTIN7	Equus caballus (Horse)	401	46566
		P83704	P83704	APOA2_HORSE	Apolipoprotein A-II (Apo-AII) (ApoA-II) (Apolipoprotein A2)	APOA2	Equus caballus (Horse)	76	8617
		A0A5F5Q0U3	A0A5F5Q0U3	A0A5F5Q0U3_HORSE	Zyxin	ZYX	Equus caballus (Horse)	601	64542
		A0A3Q2HX08	A0A3Q2HX08	A0A3Q2HX08_HORSE	Bridging integrator 2	BIN2	Equus caballus (Horse)	534	58124
		A0A9L0RI93	A0A9L0RI93	A0A9L0RI93_HORSE	Nexilin F-actin binding protein	NEXN	Equus caballus (Horse)	793	93584
		F7DDD6	F7DDD6	F7DDD6_HORSE	Ubiquitin conjugating enzyme E2 O	UBE2O	Equus caballus (Horse)	1295	141343
		F7CIZ6	F7CIZ6	F7CIZ6_HORSE	Septin	SEPTIN6	Equus caballus (Horse)	452	51523
		A0A9L0QX61	A0A9L0QX61	A0A9L0QX61_HORSE	Serpin family G member 1	SERPING1	Equus caballus (Horse)	408	45268
		A0A9L0R9G6	A0A9L0R9G6	A0A9L0R9G6_HORSE	Lin-54 DREAM MuvB core complex component	LIN54	Equus caballus (Horse)	749	79475
		F7DBE9	F7DBE9	F7DBE9_HORSE	Dynein light intermediate chain	DYNC1LI1	Equus caballus (Horse)	606	65821
		A0A5F5PIE2	A0A5F5PIE2	A0A5F5PIE2_HORSE	Synaptotagmin like 4	SYTL4	Equus caballus (Horse)	501	57725
		F6UBL0	F6UBL0	F6UBL0_HORSE	Tumor protein p53 binding protein 1	TP53BP1	Equus caballus (Horse)	1983	215520
		F6XD31	F6XD31	F6XD31_HORSE	DNA polymerase zeta catalytic subunit (EC 2.7.7.7)	REV3L	Equus caballus (Horse)	3102	349447
		A0A9L0RUK3	A0A9L0RUK3	A0A9L0RUK3_HORSE	Annexin	ANXA2	Equus caballus (Horse)	324	36937
		A0A9R1SR95	A0A9R1SR95	A0A9R1SR95_HORSE	Tubulin beta chain	TUBB TUBB2A	Equus caballus (Horse)	440	49472
		F6Y9U1	F6Y9U1	F6Y9U1_HORSE	Secretory carrier-associated membrane protein (Secretory carrier membrane protein)	SCAMP1	Equus caballus (Horse)	419	47976
		A0A3Q2HIK4	A0A3Q2HIK4	A0A3Q2HIK4_HORSE	Ig-like domain-containing protein		Equus caballus (Horse)	120	13124
